# Supplementary material
Source: publisher figshare collection journal article supplement (https://diabetesjournals.figshare.com/ndownloader/files/26207354)
Supplement: Supplementary file 1 [file 26207354]

## JUSTIFICATION FOR SUPPLEMENTAL TABLES

Both Supplemental Table 1 and Supplemental Table 2 expand on the inclusion and exclusion criteria used to conduct the analyses. A clear list of diabetes-related co-diagnoses and ICD-9-CM DM codes for types 1 and 2 diabetes will assist future research studies in the replication of and expansion on the current study. Supplemental Table 3 presents unadjusted and adjusted regression results comparing homeless minors with non-homeless minors. Presentation of unadjusted and adjusted results was recommended by the reviewers; due to the fact that the table became very large, we would like to present it as a supplemental table. Similarly, Supplemental Table 4 presents unadjusted and adjusted regression results comparing type 1 DM homeless minors with type 1 DM non-homeless minors, and Supplemental Table 5 presents unadjusted and adjusted regression results comparing type 2 DM homeless minors with type 2 DM non-homeless minors. Supplemental Table 6 displays sensitivity analysis results comparing homeless minors with non-homeless minors who reside in the lowest income quartile. Supplemental Table 7 displays sensitivity analysis results comparing type 1 DM homeless minors with type 1 DM non-homeless minors who reside in the lowest income quartile. Supplemental Table 8 displays sensitivity analysis results comparing type 2 DM homeless minors with type 2 DM non-homeless minors who reside in the lowest income quartile.

**Supplemental Table 1.** List of diabetes-related co-diagnoses**ICD-9-CM**

| <b>Code</b>    | <b>Diagnosis</b>                                                                                                                             |
|----------------|----------------------------------------------------------------------------------------------------------------------------------------------|
| 244.8          | Other specified acquired hypothyroidism                                                                                                      |
| 244.9          | Unspecified acquired hypothyroidism                                                                                                          |
| 242            | Thyrotoxicosis with or without goiter                                                                                                        |
| 558.9          | Other and unspecified noninfectious gastroenteritis and colitis                                                                              |
| 790.2          | Abnormal glucose                                                                                                                             |
| 251            | Other disorders of pancreatic internal secretion                                                                                             |
| 787            | Symptoms involving digestive system                                                                                                          |
| 276            | Disorders of fluid, electrolyte, and acid-base balance                                                                                       |
| 707            | Chronic ulcer of skin                                                                                                                        |
| 366.0          | Cataract                                                                                                                                     |
| 366.41         | Diabetic cataract                                                                                                                            |
| 436            | Acute, but ill-defined, cerebrovascular disease                                                                                              |
| 586            | Renal failure, unspecified                                                                                                                   |
| 584            | Acute kidney failure                                                                                                                         |
| 536            | Disorders of function of stomach                                                                                                             |
| 290-319        | Mental, behavioral, and neurodevelopmental disorders                                                                                         |
| 577            | Diseases of the pancreas                                                                                                                     |
| 630-677, 679.0 | Complication of pregnancy, childbirth, and the puerperium<br>Diabetes mellitus in the mother, but complicating pregnancy, childbirth, or the |
| 648.00-648.04  | puerperium                                                                                                                                   |
| 682            | Cellulitis                                                                                                                                   |
| 480-488        | Pneumonia and influenza                                                                                                                      |
| 590            | Infections of the kidney                                                                                                                     |
| 278.00-278.03  | Overweight and obesity                                                                                                                       |
| 962.3          | Poisoning by insulins and antidiabetic agents                                                                                                |
| 996.57         | Mechanical complication due to insulin pump                                                                                                  |

**Supplement Table 2.** ICD-9-CM codes, type 1 & type 2 diabetes

| <b>Type 1 Diabetes</b> |                                                                                                       | <b>Type 2 Diabetes</b> |                                                                                                            |
|------------------------|-------------------------------------------------------------------------------------------------------|------------------------|------------------------------------------------------------------------------------------------------------|
| <b>250.0</b>           | <b>Diabetes mellitus</b>                                                                              |                        |                                                                                                            |
| 250.01                 | Diabetes mellitus without mention of complication, type I [juvenile type], not stated as uncontrolled | 250.00                 | Diabetes mellitus without mention of complication, type II or unspecified type, not stated as uncontrolled |
| 250.03                 | Diabetes mellitus without mention of complication, type I [juvenile type], uncontrolled               | 250.02                 | Diabetes mellitus without mention of complication, type II, uncontrolled                                   |
| <b>250.1</b>           | <b>Diabetes with ketoacidosis</b>                                                                     |                        |                                                                                                            |
| 250.11                 | Diabetes with ketoacidosis, type I [juvenile type], not stated as uncontrolled                        | 250.10                 | Diabetes with ketoacidosis, type II or unspecified type, not stated as uncontrolled                        |
| 250.13                 | Diabetes with ketoacidosis, type I [juvenile type], uncontrolled                                      | 205.12                 | Diabetes with ketoacidosis, type II or unspecified type, uncontrolled                                      |
| <b>250.2</b>           | <b>Diabetes with hyperosmolarity</b>                                                                  |                        |                                                                                                            |
| 250.21                 | Diabetes with hyperosmolarity, type I [juvenile type], not stated as uncontrolled                     | 250.20                 | Diabetes with hyperosmolarity, type II or unspecified type, not stated as uncontrolled                     |
| 250.23                 | Diabetes with hyperosmolarity, type I [juvenile type], uncontrolled                                   | 250.22                 | Diabetes with hyperosmolarity, type II or unspecified type, uncontrolled                                   |
| <b>250.3</b>           | <b>Diabetes with other coma</b>                                                                       |                        |                                                                                                            |
| 250.31                 | Diabetes with other coma, type I [juvenile type], not stated as uncontrolled                          | 250.30                 | Diabetes with other coma, type II or unspecified type, not stated as uncontrolled                          |
| 250.33                 | Diabetes with other coma, type I [juvenile type], uncontrolled                                        | 250.32                 | Diabetes with other coma, type II or unspecified type, uncontrolled                                        |
| <b>250.4</b>           | <b>Diabetes with renal manifestations</b>                                                             |                        |                                                                                                            |
| 250.41                 | Diabetes with renal manifestations, type I [juvenile type], not stated as uncontrolled                | 250.40                 | Diabetes with renal manifestations, type II or unspecified type, not stated as uncontrolled                |

- 250.43 Diabetes with renal manifestations, type I [juvenile type], uncontrolled
- 250.5 Diabetes with ophthalmic manifestations**
- 250.51 Diabetes with ophthalmic manifestations, type I [juvenile type], not stated as uncontrolled
- 250.53 Diabetes with ophthalmic manifestations, type I [juvenile type], uncontrolled
- 250.6 Diabetes with neurological manifestations**
- 250.61 Diabetes with neurological manifestations, type I [juvenile type], not stated as uncontrolled
- 250.63 Diabetes with neurological manifestations, type I [juvenile type], uncontrolled
- 250.7 Diabetes with peripheral circulatory disorders**
- 250.71 Diabetes with peripheral circulatory disorders, type I [juvenile type], not stated as uncontrolled
- 250.73 Diabetes with peripheral circulatory disorders, type I [juvenile type], uncontrolled
- 250.8 Diabetes with other specified manifestations**
- 250.81 Diabetes with other specified manifestations, type I [juvenile type], not stated as controlled
- 250.83 Diabetes with other specified manifestations, type I [juvenile type], uncontrolled
- 250.9 Diabetes with unspecified complication**
- 250.42 Diabetes with renal manifestations, type II or unspecified type, uncontrolled
- 250.50 Diabetes with ophthalmic manifestations, type II or unspecified type, not stated as uncontrolled
- 250.52 Diabetes with ophthalmic manifestations, type II or unspecified type, uncontrolled
- 250.60 Diabetes with neurological manifestations, type II or unspecified type, not stated as uncontrolled
- 250.62 Diabetes with neurological manifestations, type II or unspecified type, uncontrolled
- 250.70 Diabetes with peripheral circulatory disorders, type II or unspecified type, not stated as uncontrolled
- 250.72 Diabetes with peripheral circulatory disorders, type II or unspecified type, uncontrolled
- 250.80 Diabetes with other specified manifestations, type II or unspecified type, not stated as uncontrolled
- 250.82 Diabetes with other specified manifestations, type II or unspecified type, uncontrolled

250.91 Diabetes with unspecified complication,  
type I [juvenile type], not stated as  
uncontrolled

250.93 Diabetes with unspecified complication,  
type I [juvenile type], uncontrolled

250.90 Diabetes with unspecified complication,  
type II or unspecified type, not stated as  
uncontrolled

250.92 Diabetes with unspecified complication,  
type II or unspecified type, uncontrolled

---

**Supplement Table 3.** Unadjusted and adjusted regression results for the effect of homeless vs. non-homeless status on hospital-related outcomes

|                                     | Unadjusted            |                    |      | Adjusted*             |                    |      | AIC <sup>§</sup><br>without<br>homeless | AIC with<br>homeless |
|-------------------------------------|-----------------------|--------------------|------|-----------------------|--------------------|------|-----------------------------------------|----------------------|
|                                     | Estimate <sup>†</sup> | 95%CI <sup>‡</sup> | P    | Estimate <sup>†</sup> | 95%CI <sup>‡</sup> | P    |                                         |                      |
| In-hospital mortality <sup>  </sup> |                       |                    |      |                       |                    |      |                                         |                      |
| Homeless                            | 2.43                  | [0.00, 0.00]       | .85  | 2.27                  | [0.20, 25.28]      | .51  | 109                                     | 110                  |
| Non-homeless                        | <b>REFERENCE</b>      |                    |      | <b>REFERENCE</b>      |                    |      |                                         |                      |
| Emergency admission <sup>¶</sup>    |                       |                    |      |                       |                    |      |                                         |                      |
| Homeless                            | 1.50                  | [1.21, 1.86]       | <.01 | 1.54                  | [1.23, 1.92]       | <.01 | 11,947                                  | 11,934               |
| Non-homeless                        | <b>REFERENCE</b>      |                    |      | <b>REFERENCE</b>      |                    |      |                                         |                      |
| Ketoacidosis <sup>  </sup>          |                       |                    |      |                       |                    |      |                                         |                      |
| Homeless                            | 0.75                  | [0.58, 0.98]       | .03  | 0.75                  | [0.59, 0.96]       | .02  | 14,016                                  | 14,013               |
| Non-homeless                        | <b>REFERENCE</b>      |                    |      | <b>REFERENCE</b>      |                    |      |                                         |                      |
| Hospitalization cost <sup>#</sup>   |                       |                    |      |                       |                    |      |                                         |                      |
| Homeless                            | 0.87                  | [0.78, 0.96]       | <.01 | 0.88                  | [0.79, 0.97]       | <.01 | 21,864                                  | 21,845               |
| Non-homeless                        | <b>REFERENCE</b>      |                    |      | <b>REFERENCE</b>      |                    |      |                                         |                      |
| Length of stay <sup>**</sup>        |                       |                    |      |                       |                    |      |                                         |                      |
| Homeless                            | 1.43                  | [1.27, 1.60]       | <.01 | 1.20                  | [1.08, 1.35]       | <.01 | 46,279                                  | 46,270               |
| Non-homeless                        | <b>REFERENCE</b>      |                    |      | <b>REFERENCE</b>      |                    |      |                                         |                      |
| DM2 <sup>  , ††</sup>               |                       |                    |      |                       |                    |      |                                         |                      |
| Homeless                            | 3.99                  | [0.06, 0.08]       | <.01 | 2.02                  | [1.20, 3.38]       | <.01 | 7,525                                   | 7,520                |
| Non-homeless                        | <b>REFERENCE</b>      |                    |      | <b>REFERENCE</b>      |                    |      |                                         |                      |

\*Models adjusted by age, race/ethnicity, sex, and insurance type

<sup>†</sup>Estimates presented as Odds Ratios (ORs), except length of stay, which is presented as an Incidence Rate Ratio (IRR), and hospitalization cost, which is presented as a Means Ratio.

<sup>‡</sup>Confidence Interval

<sup>§</sup>Akaike Information Criterion

<sup>||</sup>Hierarchical multivariable logistic regression

<sup>¶</sup>Multivariable logistic regression

<sup>#</sup>Hierarchical multivariable log-transformed linear regression

<sup>\*\*</sup>Hierarchical multivariable negative binomial regression

<sup>††</sup>Type 2 diabetes

**Supplement Table 4.** Unadjusted and adjusted regression results among type 1 DM homeless vs. non-homeless status on hospital-related outcomes

|                                     | Unadjusted            |                    |          | Adjusted*             |                    |          | AIC <sup>§</sup> |                   |
|-------------------------------------|-----------------------|--------------------|----------|-----------------------|--------------------|----------|------------------|-------------------|
|                                     | Estimate <sup>†</sup> | 95%CI <sup>‡</sup> | <i>P</i> | Estimate <sup>†</sup> | 95%CI <sup>‡</sup> | <i>P</i> | without homeless | AIC with homeless |
| In-hospital mortality <sup>  </sup> |                       |                    |          |                       |                    |          |                  |                   |
| Homeless                            | -                     | -                  | -        | -                     | -                  | -        | -                | -                 |
| Non-homeless                        | <b>REFERENCE</b>      |                    |          | <b>REFERENCE</b>      |                    |          |                  |                   |
| Emergency admission <sup>¶</sup>    |                       |                    |          |                       |                    |          |                  |                   |
| Homeless                            | 1.79                  | [1.39, 2.30]       | <.01     | 1.88                  | [1.45, 2.43]       | <.01     | 10,329           | 10,305            |
| Non-homeless                        | <b>REFERENCE</b>      |                    |          | <b>REFERENCE</b>      |                    |          |                  |                   |
| Ketoacidosis <sup>#</sup>           |                       |                    |          |                       |                    |          |                  |                   |
| Homeless                            | 1.05                  | [0.79, 1.40]       | .74      | 0.77                  | [0.54, 1.09]       | .14      | 12,565           | 12,564            |
| Non-homeless                        | <b>REFERENCE</b>      |                    |          | <b>REFERENCE</b>      |                    |          |                  |                   |
| Hospitalization cost <sup>**</sup>  |                       |                    |          |                       |                    |          |                  |                   |
| Homeless                            | 0.90                  | [0.80, 1.01]       | .08      | 1.06                  | [0.82, 1.03]       | .17      | 18,630           | 18,630            |
| Non-homeless                        | <b>REFERENCE</b>      |                    |          | <b>REFERENCE</b>      |                    |          |                  |                   |
| Length of stay <sup>††</sup>        |                       |                    |          |                       |                    |          |                  |                   |
| Homeless                            | 1.41                  | [1.24, 1.60]       | <.01     | 1.22                  | [1.08, 1.37]       | <.01     | 39,075           | 39,068            |
| Non-homeless                        | <b>REFERENCE</b>      |                    |          | <b>REFERENCE</b>      |                    |          |                  |                   |

\*Models adjusted by age, race/ethnicity, sex, and insurance type

<sup>†</sup>Estimates presented as Odds Ratios (ORs), except length of stay which is presented as an Incidence Rate Ratio (IRR), and hospitalization cost, which is presented as a Means Ratio.

<sup>‡</sup>Confidence Interval

<sup>§</sup>Akaike Information Criterion

<sup>||</sup>In-hospital mortality omitted as outcome due to ≤10 cases

<sup>¶</sup>Multivariable logistic regression

<sup>#</sup>Hierarchical multivariable logistic regression

<sup>\*\*</sup>Hierarchical multivariable log-transformed linear regression

<sup>††</sup>Hierarchical multivariable negative binomial regression

**Supplement Table 5.** Unadjusted and adjusted regression results among type 2 DM homeless vs. non-homeless status on hospital-related outcomes

|                                     | Unadjusted            |                    |      | Adjusted*             |                    |      | AIC <sup>§</sup><br>without<br>homeless | AIC with<br>homeless |
|-------------------------------------|-----------------------|--------------------|------|-----------------------|--------------------|------|-----------------------------------------|----------------------|
|                                     | Estimate <sup>†</sup> | 95%CI <sup>‡</sup> | P    | Estimate <sup>†</sup> | 95%CI <sup>‡</sup> | P    |                                         |                      |
| In-hospital mortality <sup>  </sup> |                       |                    |      |                       |                    |      |                                         |                      |
| Homeless                            | -                     | -                  | -    | -                     | -                  | -    | -                                       | -                    |
| Non-homeless                        | <b>REFERENCE</b>      |                    |      | <b>REFERENCE</b>      |                    |      |                                         |                      |
| Emergency admission <sup>¶</sup>    |                       |                    |      |                       |                    |      |                                         |                      |
| Homeless                            | 0.85                  | [0.56, 1.31]       | .47  | 0.74                  | [0.47, 1.14]       | .17  | 1,639                                   | 1,639                |
| Non-homeless                        | <b>REFERENCE</b>      |                    |      | <b>REFERENCE</b>      |                    |      |                                         |                      |
| Ketoacidosis <sup>#</sup>           |                       |                    |      |                       |                    |      |                                         |                      |
| Homeless                            | 0.70                  | [0.35, 1.38]       | .30  | 0.70                  | [0.36, 1.34]       | .28  | 1,387                                   | 1,388                |
| Non-homeless                        | <b>REFERENCE</b>      |                    |      | <b>REFERENCE</b>      |                    |      |                                         |                      |
| Hospitalization cost <sup>**</sup>  |                       |                    |      |                       |                    |      |                                         |                      |
| Homeless                            | 0.77                  | [0.65, 0.92]       | <.01 | 0.77                  | [0.65, 0.93]       | <.01 | 3,200                                   | 3,190                |
| Non-homeless                        | <b>REFERENCE</b>      |                    |      | <b>REFERENCE</b>      |                    |      |                                         |                      |
| Length of stay <sup>††</sup>        |                       |                    |      |                       |                    |      |                                         |                      |
| Homeless                            | 1.25                  | [1.00, 1.57]       | .05  | 1.10                  | [0.87, 1.38]       | .44  | 7,081                                   | 7,082                |
| Non-homeless                        | <b>REFERENCE</b>      |                    |      | <b>REFERENCE</b>      |                    |      |                                         |                      |

\*Models adjusted by age, race/ethnicity, sex, and insurance type

<sup>†</sup>Estimates presented as Odds Ratios (ORs), except length of stay which is presented as an Incidence Rate Ratio (IRR), and hospitalization cost, which is presented as a Means Ratio.

<sup>‡</sup>Confidence Interval

<sup>§</sup>Akaike Information Criterion

<sup>||</sup>In-hospital mortality omitted as outcome due to  $\leq 10$  cases

<sup>¶</sup>Multivariable logistic regression

<sup>#</sup>Hierarchical multivariable logistic regression

<sup>\*\*</sup>Hierarchical multivariable log-transformed linear regression

<sup>††</sup>Hierarchical multivariable negative binomial regression



**Supplement Table 6.** Adjusted regression results for homeless vs. low income non-homeless status on hospital-related outcomes\*

|                                           | Estimate <sup>†</sup> | 95%CI <sup>‡</sup> | P    | AIC <sup>§</sup><br>without<br>homeless | AIC with<br>homeless |
|-------------------------------------------|-----------------------|--------------------|------|-----------------------------------------|----------------------|
| <b>In-hospital mortality<sup>  </sup></b> |                       |                    |      |                                         |                      |
| Homeless                                  | -                     | -                  | -    | -                                       | -                    |
| Non-homeless                              | <b>REFERENCE</b>      |                    |      |                                         |                      |
| <b>Emergency admission<sup>¶</sup></b>    |                       |                    |      |                                         |                      |
| Homeless                                  | 1.42                  | [1.04, 1.95]       | .03  | 2,274                                   | 2,271                |
| Non-homeless                              | <b>REFERENCE</b>      |                    |      |                                         |                      |
| <b>Ketoacidosis<sup>#</sup></b>           |                       |                    |      |                                         |                      |
| Homeless                                  | 0.71                  | [0.51, 0.98]       | .04  | 2,755                                   | 2,752                |
| Non-homeless                              | <b>REFERENCE</b>      |                    |      |                                         |                      |
| <b>Hospitalization cost<sup>**</sup></b>  |                       |                    |      |                                         |                      |
| Homeless                                  | 0.74                  | [0.65, 0.83]       | <.01 | 4,715                                   | 4,695                |
| Non-homeless                              | <b>REFERENCE</b>      |                    |      |                                         |                      |
| <b>Length of stay<sup>††</sup></b>        |                       |                    |      |                                         |                      |
| Homeless                                  | 1.14                  | [0.98, 1.32]       | .08  | 10,057                                  | 10,056               |
| Non-homeless                              | <b>REFERENCE</b>      |                    |      |                                         |                      |
| <b>DM2<sup>#, **</sup></b>                |                       |                    |      |                                         |                      |
| Homeless                                  | 2.85                  | [0.84, 9.71]       | .09  | 1,547                                   | 1,546                |
| Non-homeless                              | <b>REFERENCE</b>      |                    |      |                                         |                      |

\*Models adjusted by age, race/ethnicity, sex, and insurance type

<sup>†</sup>Estimates presented as Odds Ratios (ORs), except length of stay which is presented as an Incidence Rate Ratio (IRR), and hospitalization cost, which is presented as a Means Ratio.

<sup>‡</sup>Confidence Interval

<sup>§</sup>Akaike Information Criterion

<sup>||</sup>In-hospital mortality omitted as outcome due to ≤10 cases

<sup>¶</sup>Multivariable logistic regression

<sup>#</sup>Hierarchical multivariable logistic regression

<sup>\*\*</sup>Hierarchical multivariable log-transformed linear regression

<sup>††</sup>Hierarchical multivariable negative binomial regression

<sup>\*\*</sup>Type 2 diabetes

**Supplement Table 7.** Adjusted regression results for type 1 DM homeless vs. low income non-homeless status on hospital-related outcomes\*

|                                           | Estimate <sup>†</sup> | 95%CI <sup>‡</sup> | P    | AIC <sup>§</sup><br>without<br>homeless | AIC with<br>homeless |
|-------------------------------------------|-----------------------|--------------------|------|-----------------------------------------|----------------------|
| <b>In-hospital mortality<sup>  </sup></b> |                       |                    |      |                                         |                      |
| Homeless                                  | -                     | -                  | -    | -                                       | -                    |
| Non-homeless                              | <b>REFERENCE</b>      |                    |      |                                         |                      |
| <b>Emergency admission<sup>¶</sup></b>    |                       |                    |      |                                         |                      |
| Homeless                                  | 1.87                  | [1.28, 2.74]       | <.01 | 2,144                                   | 2,134                |
| Non-homeless                              | <b>REFERENCE</b>      |                    |      |                                         |                      |
| <b>Ketoacidosis<sup>#</sup></b>           |                       |                    |      |                                         |                      |
| Homeless                                  | 0.79                  | [0.55, 1.12]       | .18  | 2,655                                   | 2,655                |
| Non-homeless                              | <b>REFERENCE</b>      |                    |      |                                         |                      |
| <b>Hospitalization cost<sup>**</sup></b>  |                       |                    |      |                                         |                      |
| Homeless                                  | 0.78                  | [0.67, 0.90]       | <.01 | 4,423                                   | 4,416                |
| Non-homeless                              | <b>REFERENCE</b>      |                    |      |                                         |                      |
| <b>Length of stay<sup>††</sup></b>        |                       |                    |      |                                         |                      |
| Homeless                                  | 1.22                  | [1.03, 1.44]       | .02  | 9,432                                   | 9,429                |
| Non-homeless                              | <b>REFERENCE</b>      |                    |      |                                         |                      |

\*Models adjusted by age, race/ethnicity, sex, and insurance type

<sup>†</sup>Estimates presented as Odds Ratios (ORs), except length of stay which is presented as an Incidence Rate Ratio (IRR), and hospitalization cost, which is presented as a Means Ratio.

<sup>‡</sup>Confidence Interval

<sup>§</sup>Akaike Information Criterion

<sup>||</sup>In-hospital mortality omitted as outcome due to  $\leq 10$  cases

<sup>¶</sup>Multivariable logistic regression

<sup>#</sup>Hierarchical multivariable logistic regression

<sup>\*\*</sup>Hierarchical multivariable log-transformed linear regression

<sup>††</sup>Hierarchical multivariable negative binomial regression

**Supplement Table 8.** Adjusted regression results for type 2 DM homeless vs. low income non-homeless status on hospital-related outcomes\*

|                                     | Estimate <sup>†</sup> | 95%CI <sup>‡</sup> | P    | AIC <sup>§</sup><br>without<br>homeless | AIC with<br>homeless |
|-------------------------------------|-----------------------|--------------------|------|-----------------------------------------|----------------------|
| In-hospital mortality <sup>  </sup> |                       |                    |      |                                         |                      |
| Homeless                            | -                     | -                  | -    | -                                       | -                    |
| Non-homeless                        | <b>REFERENCE</b>      |                    |      |                                         |                      |
| Emergency admission <sup>¶</sup>    |                       |                    |      |                                         |                      |
| Homeless                            | 0.69                  | [0.39, 1.23]       | .21  | 1,845                                   | 1,846                |
| Non-homeless                        | <b>REFERENCE</b>      |                    |      |                                         |                      |
| Ketoacidosis <sup>#</sup>           |                       |                    |      |                                         |                      |
| Homeless                            | 0.39                  | [0.16, 0.95]       | .04  | 2,091                                   | 2,088                |
| Non-homeless                        | <b>REFERENCE</b>      |                    |      |                                         |                      |
| Hospitalization cost <sup>**</sup>  |                       |                    |      |                                         |                      |
| Homeless                            | 0.64                  | [0.51, 0.81]       | <.01 | 3,623                                   | 3,611                |
| Non-homeless                        | <b>REFERENCE</b>      |                    |      |                                         |                      |
| Length of stay <sup>††</sup>        |                       |                    |      |                                         |                      |
| Homeless                            | 0.98                  | [0.76, 1.27]       | .90  | 7,407                                   | 7,409                |
| Non-homeless                        | <b>REFERENCE</b>      |                    |      |                                         |                      |

\*Models adjusted by age, race/ethnicity, sex, and insurance type

<sup>†</sup>Estimates presented as Odds Ratios (ORs), except length of stay which is presented as an Incidence Rate Ratio (IRR), and hospitalization cost, which is presented as a Means Ratio.

<sup>‡</sup>Confidence Interval

<sup>§</sup>Akaike Information Criterion

<sup>||</sup>In-hospital mortality omitted as outcome due to  $\leq 10$  cases

<sup>¶</sup>Multivariable logistic regression

<sup>#</sup>Hierarchical multivariable logistic regression

<sup>\*\*</sup>Hierarchical multivariable log-transformed linear regression

<sup>††</sup>Hierarchical multivariable negative binomial regression
